# Supplementary material
Source: publisher figshare collection journal article supplement (https://asha.figshare.com/articles/dataset/_/12765551)
Supplement: Supplementary file 2 [file 1]

## Supplemental Material S1. Stimuli grouped by set.

| <b>English hermit</b> | <b>Novel neighbor</b> | <b>English hermit</b> | <b>Novel neighbor</b> |
|-----------------------|-----------------------|-----------------------|-----------------------|
| concrete              | confrete              | canopy                | canozy                |
| cradle                | cragle                | guitar                | guimar                |
| fabric                | fubric                | italic                | itazic                |
| needle                | neesle                | library               | likrary               |
| sleeve                | sleere                | pencil                | puncil                |
| violin                | viodin                | teapot                | teamot                |
| apricot               | aplicot               | bamboo                | balboo                |
| garlic                | garnic                | celery                | cedery                |
| meadow                | meagow                | hamster               | hamsper               |
| mineral               | mikeral               | mosquito              | mosquibo              |
| potato                | polato                | papaya                | palaya                |
| turkey                | turbey                | spider                | spimer                |

| <b>English hermit</b> | <b>Novel neighbor</b> | <b>English hermit</b> | <b>Novel neighbor</b> |
|-----------------------|-----------------------|-----------------------|-----------------------|
| clinic                | clizic                | carpet                | carget                |
| harness               | harpess               | domino                | dopino                |
| mosaic                | motaic                | helmet                | holmet                |
| napkin                | naskin                | jersey                | jerfey                |
| parcel                | pargel                | museum                | muleum                |
| studio                | stubio                | stereo                | stemeo                |
| amazon                | alazon                | almond                | albond                |
| artery                | arpery                | buffalo               | buffamo               |
| jasmine               | jafmine               | canary                | capary                |
| kidney                | kadney                | microbe               | mitrobe               |
| membrane              | memfrane              | particle              | parvicle              |
| tomato                | torato                | tendon                | tenlon                |

*Note.* The novel neighbors served as the stimuli for the training conditions and were tested in the 3AFC and 4AFC link recognition tasks. The English hermits served as the stimuli for the lexical integration test. All hermits were nouns between six and eight letters long. Half of the hermits in each set referred to “natural” items (e.g., “spider,” “potato”), and the other half were non-natural, or “artefacts” (e.g., “helmet,” “needle”). Twenty-three of the 48 hermits were selected from those used in Bowers, Davis, and Hanley (2005); eleven hermits were not used because their respective novel word pairs contained added sounds resulting in unequal number of phonological segments (e.g., 5 segments in “jackal” /dʒækəl/ and 6 segments in “jankal” /dʒæŋkəl/. The remaining twenty-five hermits were selected using the MCWord Orthographic Wordform Database CLEARPOND database (Marian et al., 2012). All novel words were formed by substituting a single word-medial letter (i.e., never the first or final letter of the word), which did not result in a change of phonological word length.

## References

- Bowers, J. S., Davis, C. J., & Hanley, D. A. (2005). Automatic semantic activation of embedded words: Is there a "hat" in "that"? *Journal of Memory and Language*, 52(1), 131–143. <https://doi.org/10.1016/j.jml.2004.09.003>
- Marian, V., Bartolotti, J., Chabal, S., Shook, A. (2012). CLEARPOND: Cross-Linguistic Easy-Access Resource for Phonological and Orthographic Neighborhood Densities. *PLoS ONE*, 7(8): e43230. <https://doi.org/10.1371/journal.pone.0043230>
